# Supplementary material for: PEGylated cationic hybrid bicellar nanodisc for efficient siRNA delivery
Source: Royal Society of Chemistry journal article supplement (doi:10.1039/c6ra24268e), 2016-01-01

## Supporting information

### PEGylated Cationic Hybrid Bicellar Nanodisc for Efficient siRNA Delivery

Yanyan Li<sup>a†</sup>, Yidi Wu<sup>c†</sup>, Shuquan Zheng<sup>c</sup>, Xiaolong Liang<sup>e</sup>, Xiaorui Han<sup>c</sup>, Renfa Liu<sup>d</sup>,  
Deyao Zhao<sup>c</sup>, Yunhui Zhao<sup>f</sup>, Yushen Jin<sup>d</sup>, Min Chen<sup>d</sup>, Xiaoxia Wang<sup>c</sup>, Huiqing  
Cao<sup>c</sup>, Xiuli Yue<sup>b\*</sup>, Tiejun Shi<sup>a, g\*</sup>, Zicai Liang<sup>c\*\*</sup>

<sup>a</sup>School of Life Science and Technology, Harbin Institute of Technology, Harbin 150001, PR China,

<sup>b</sup>School of Municipal and Environmental Engineering, Harbin Institute of Technology, Harbin  
150001, PR China,

<sup>c</sup>Laboratory of Nucleic Acid Technology, Institute of Molecular Medicine, Peking University, Beijing  
100871, PR China,

<sup>d</sup>Department of Biomedical Engineering, College of Engineering, Peking University, Beijing 100871,  
PR China,

<sup>e</sup>Department of Ultrasonography, Peking University Third Hospital, Beijing 100191, PR China

<sup>f</sup>School of Chemistry and Chemical Engineering, Hunan University of Science and Technology,  
Xiangtan 411201, PR China.

<sup>g</sup>Department of Biomedicine, University of Bergen, Bergen, Norway.

†These authors contributed equally to this work.

X.L.Yue: xiulidx@163.com

T. Shi: tiejun.shi@uib.no

Z.C.Liang: liangz@pku.edu.cn

Figure S1. Cytotoxicity of NDs. Viability of HepG2-Luc cells after 24h exposure to ND1 and ND5 by MTT assay.

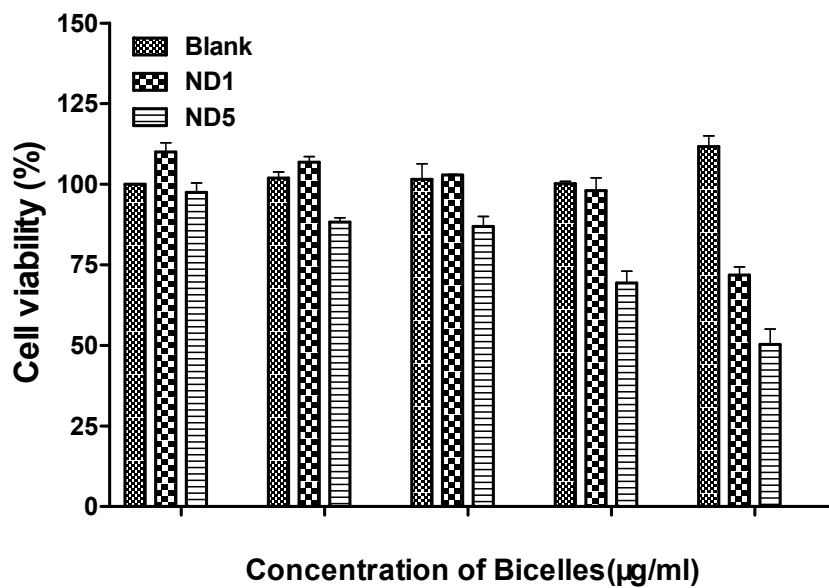

Figure S2. Intracellular distributions and cellular uptake of ND1-4/siRNA complexes. (A) Intracellular distributions of Cy5-labeled siRNA loaded by the NDs were examined by confocal laser scanning microscopy (CLSM). LysoTracker®Green was used to stain lysosome (green), Hoechst 33342 was used to stain nuclei (blue) and siRNA was labelled with Cy5 (red).

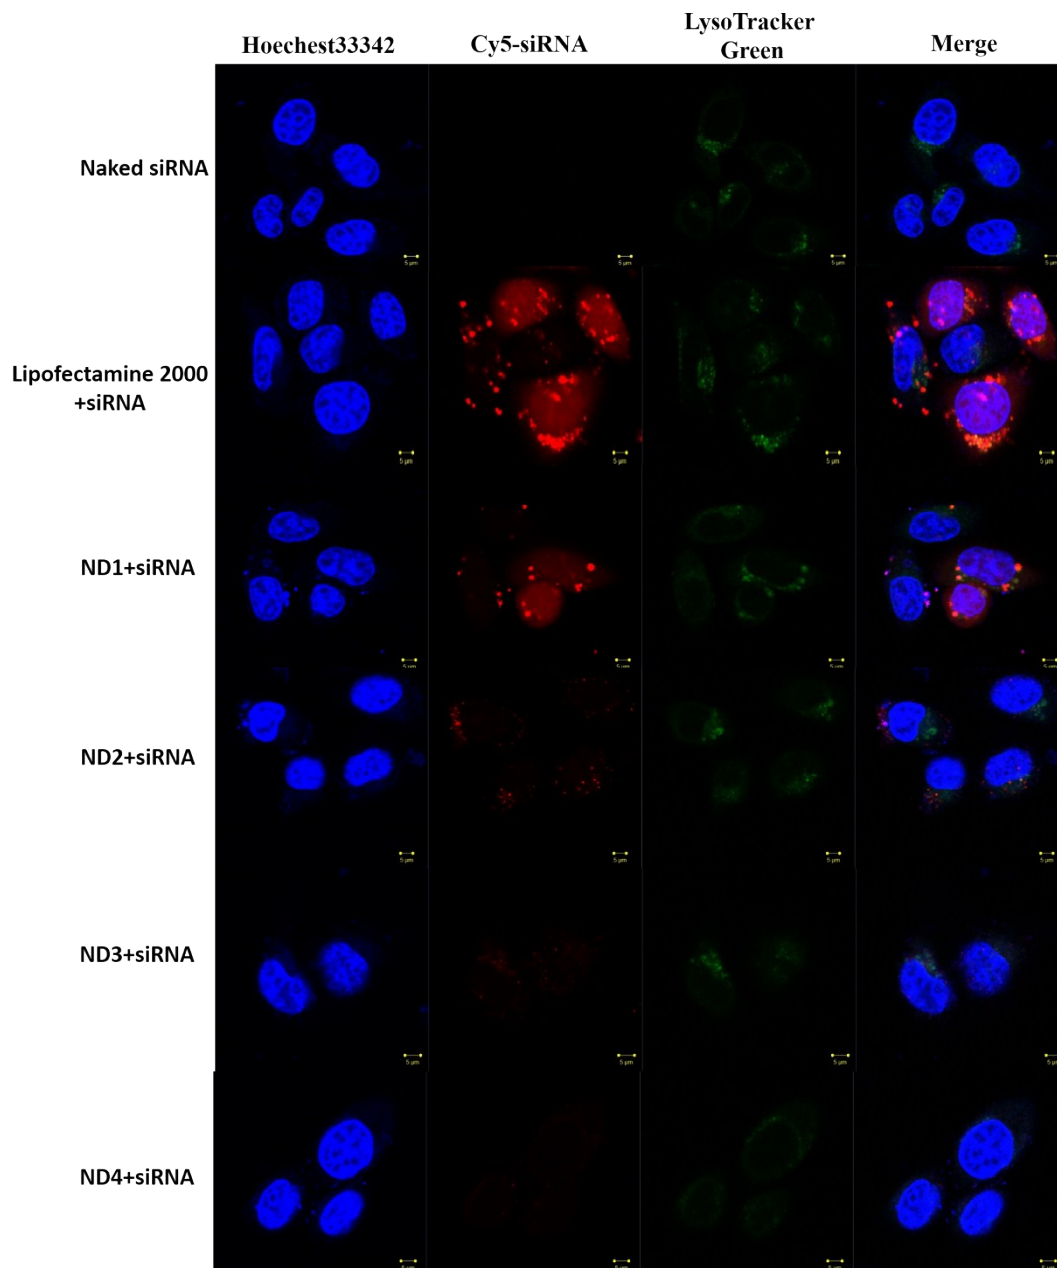

Supplement: c6ra24268e1.pdf [file c6ra24268e1.pdf]
